# Supplementary material
Source: publisher figshare collection journal article supplement (https://gsapubs.figshare.com/articles/dataset/_/12540320)
Supplement: Supplementary file 1 [file 1]

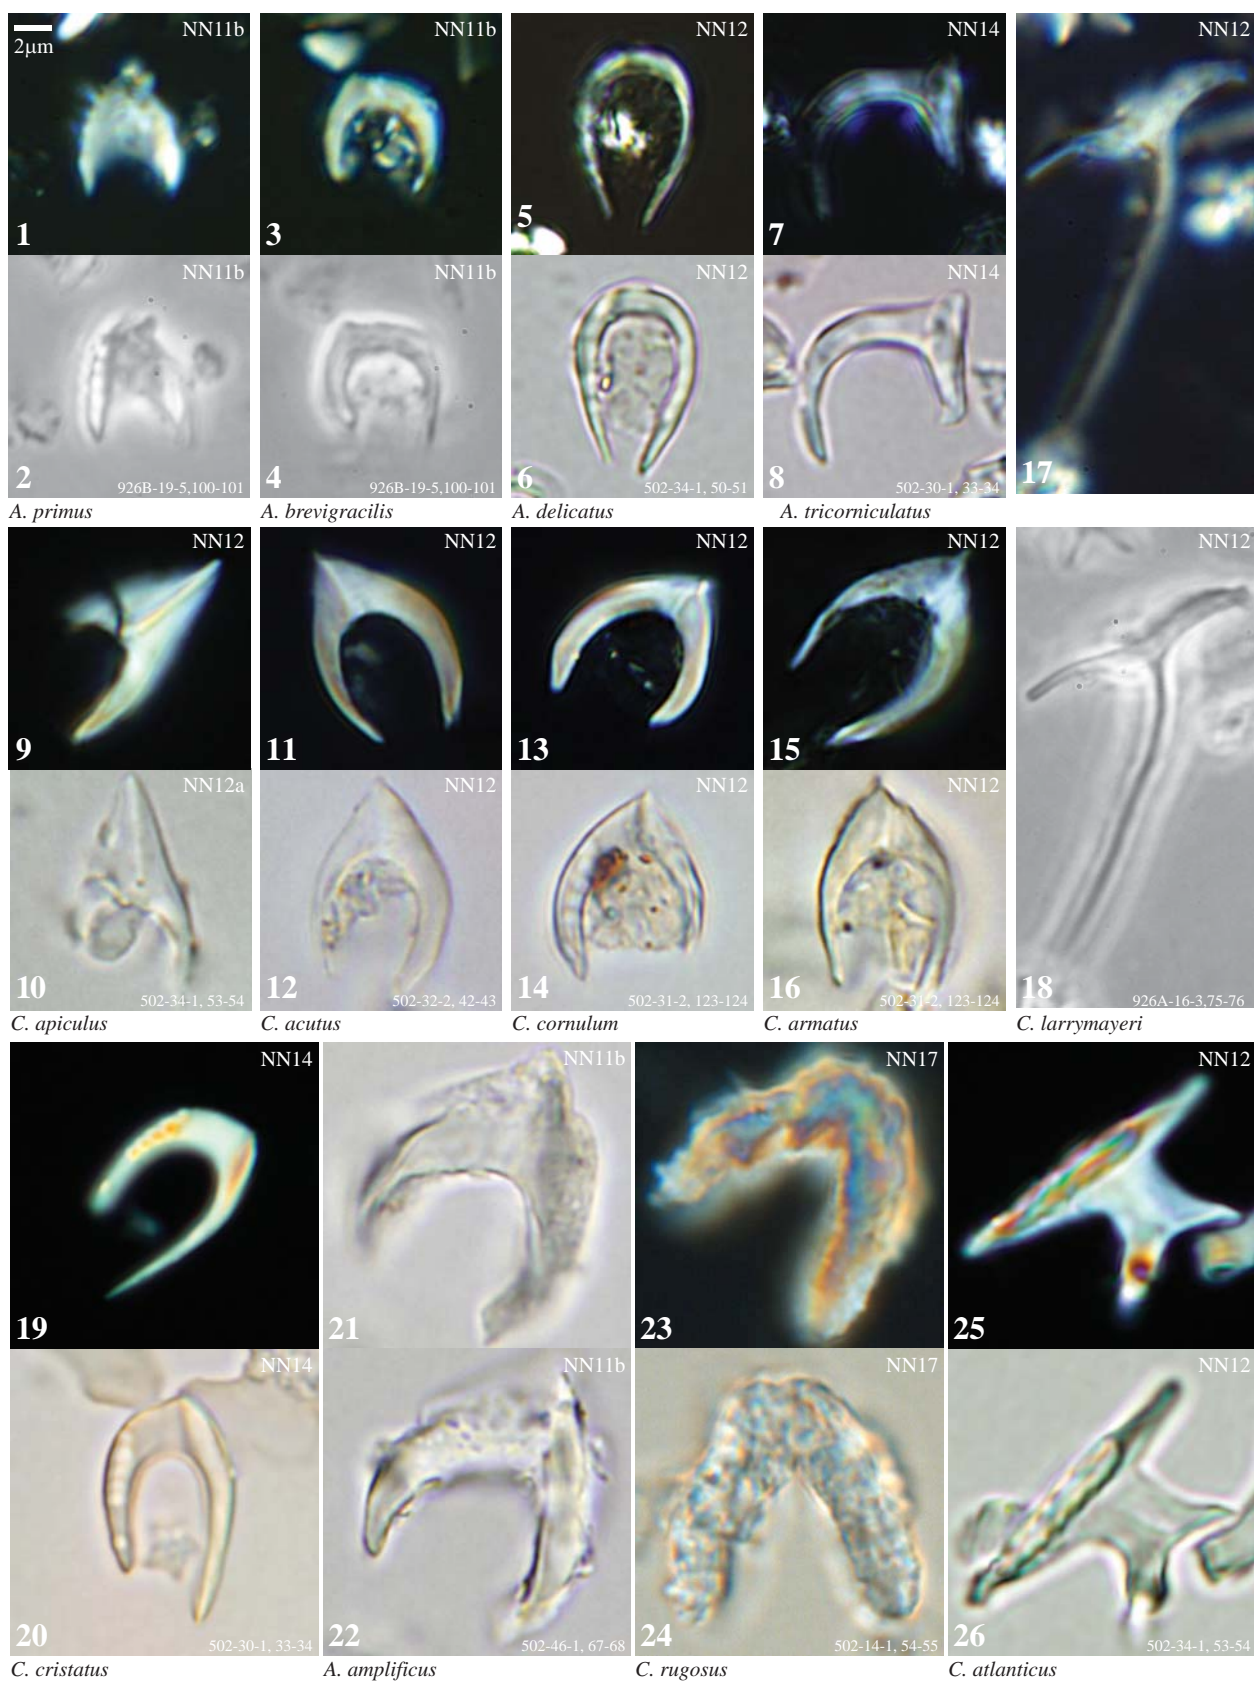

PLATE S1. Nannofossil genera *Amaurolithus* and *Ceratolithus*.

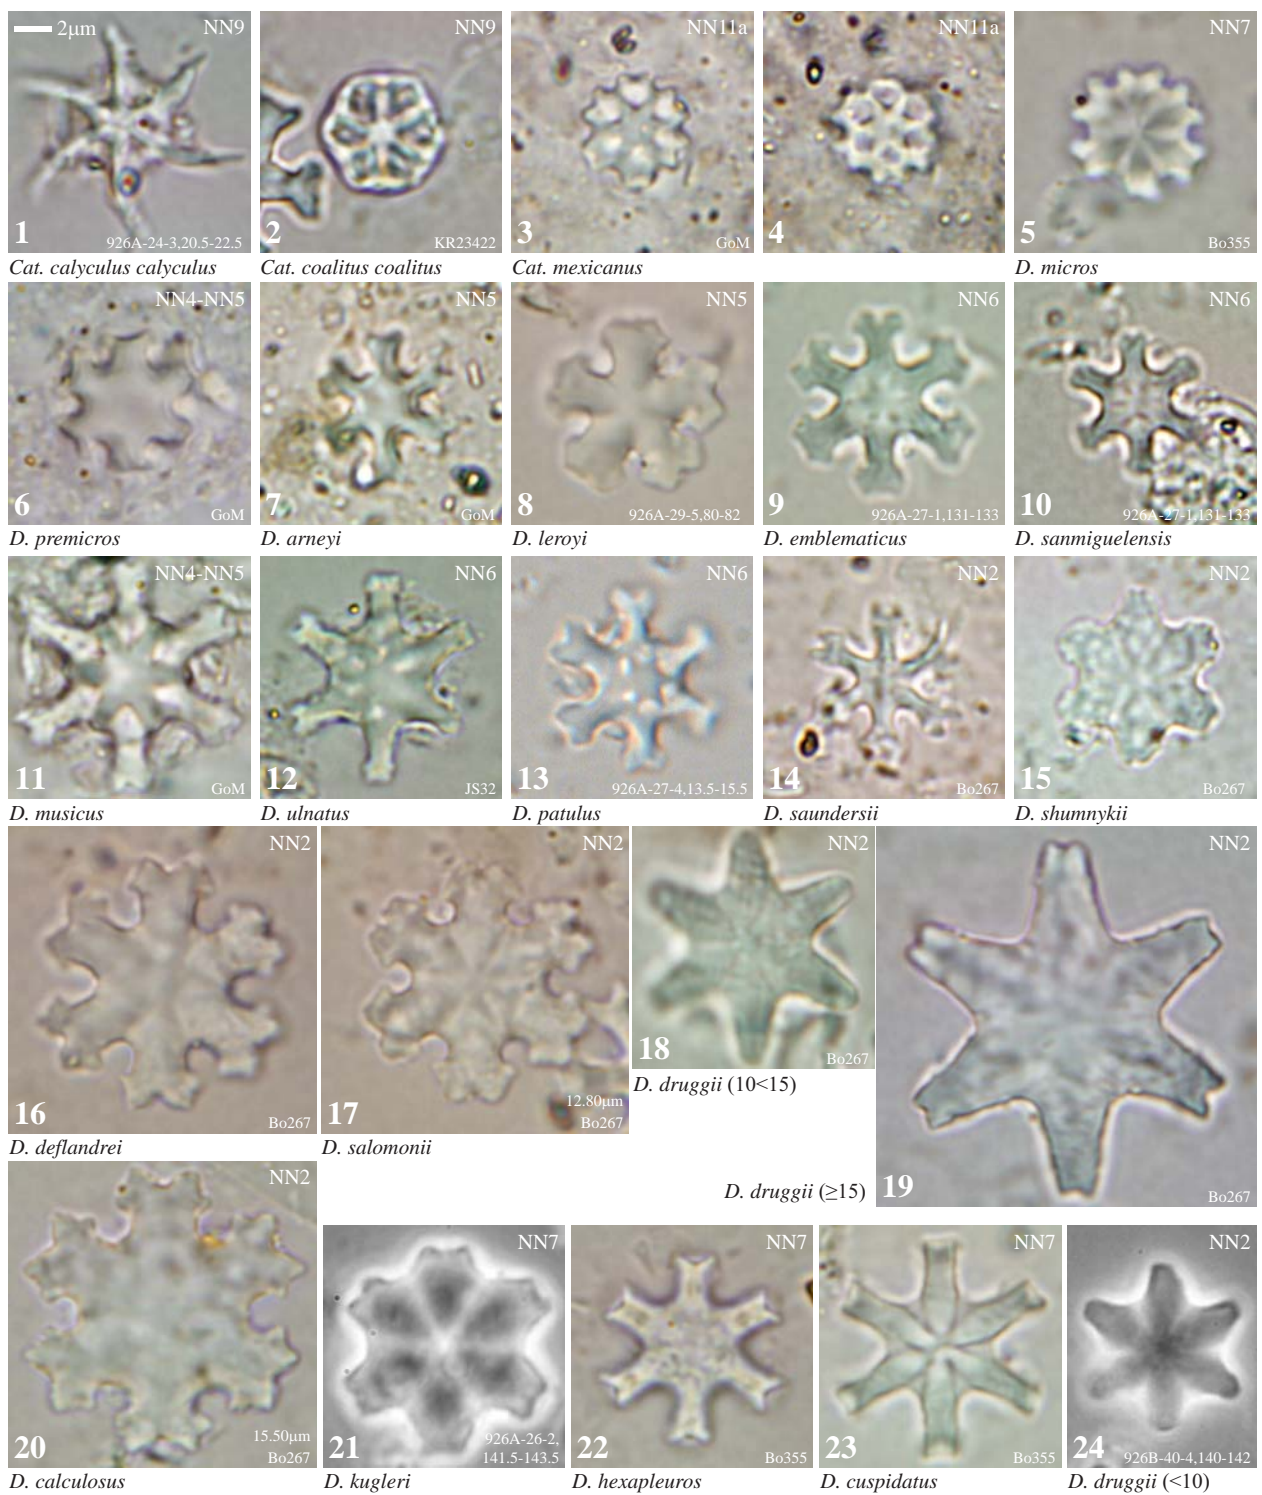

PLATE S2. Nannofossil genera *Catinaster* and *Discoaster*.



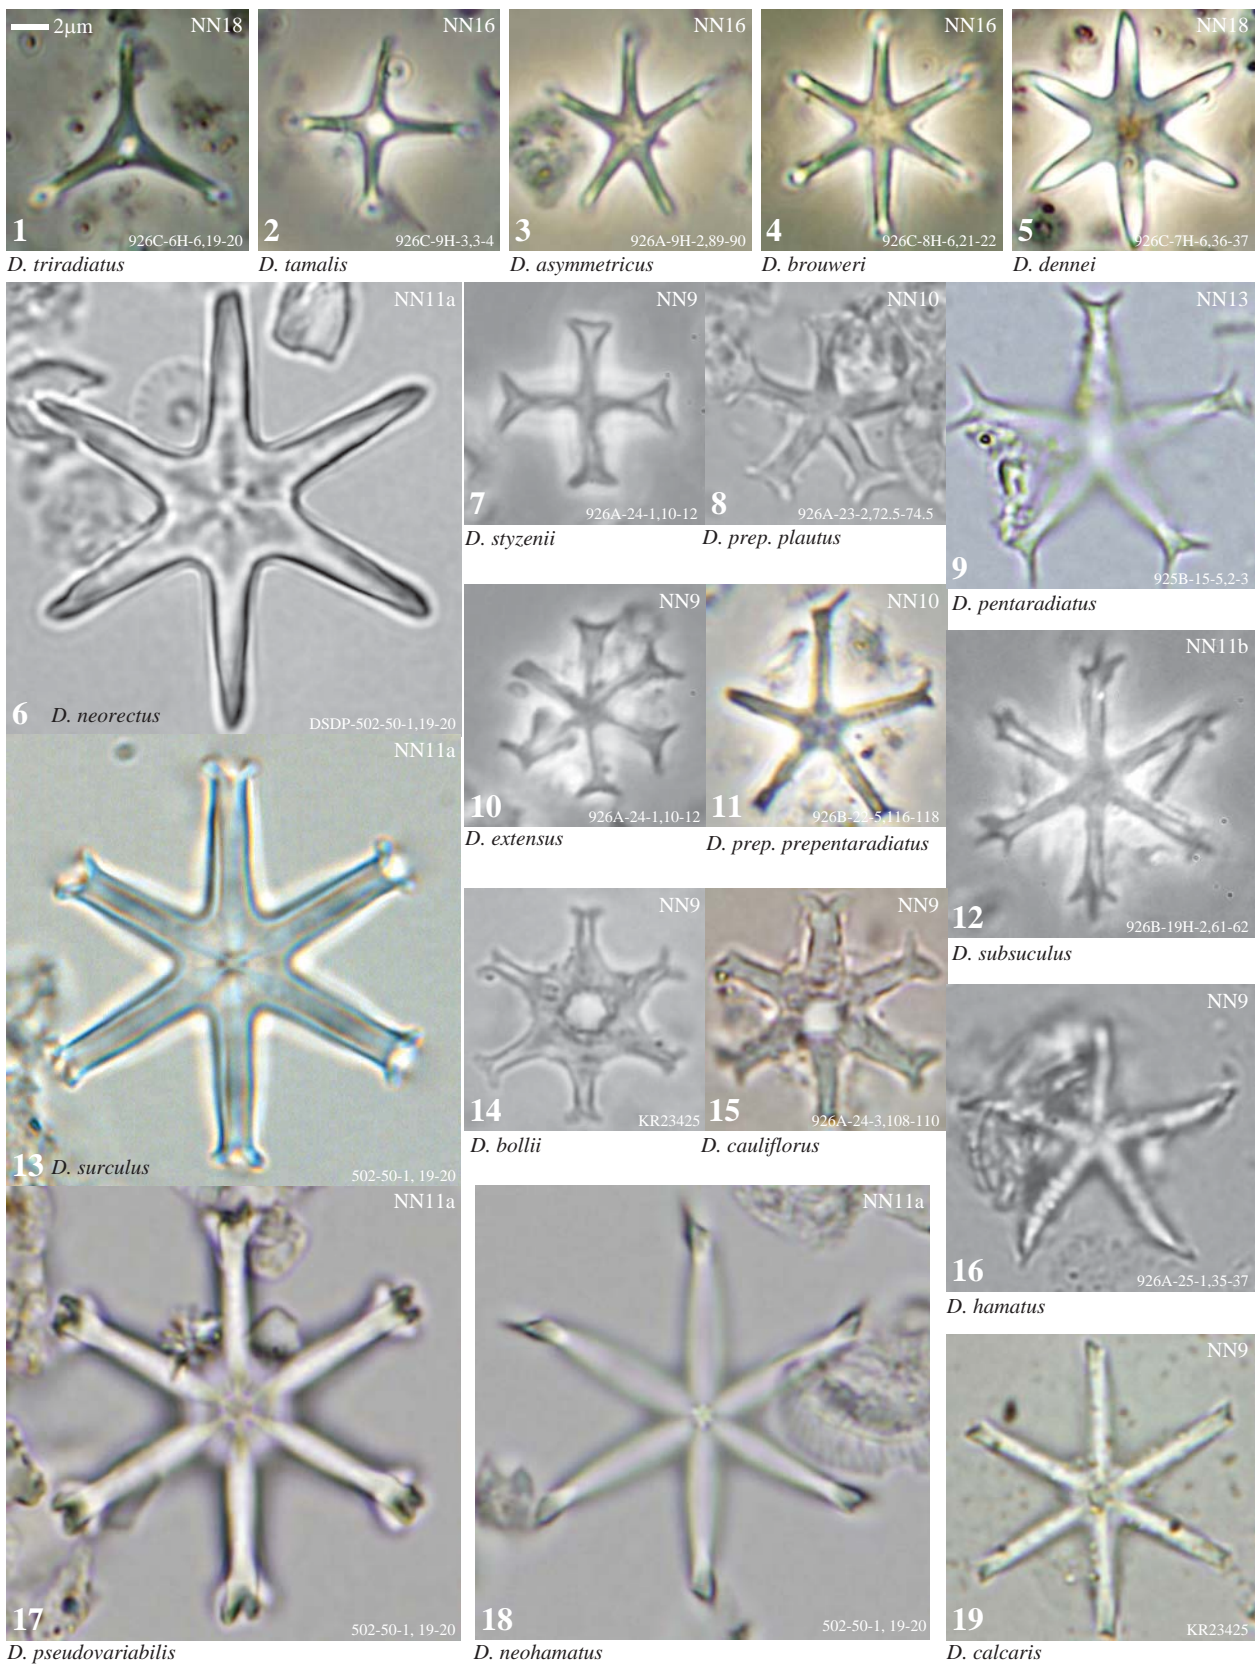

PLATE S3. Nannofossil genus *Discoaster* (upper Miocene-Pliocene).

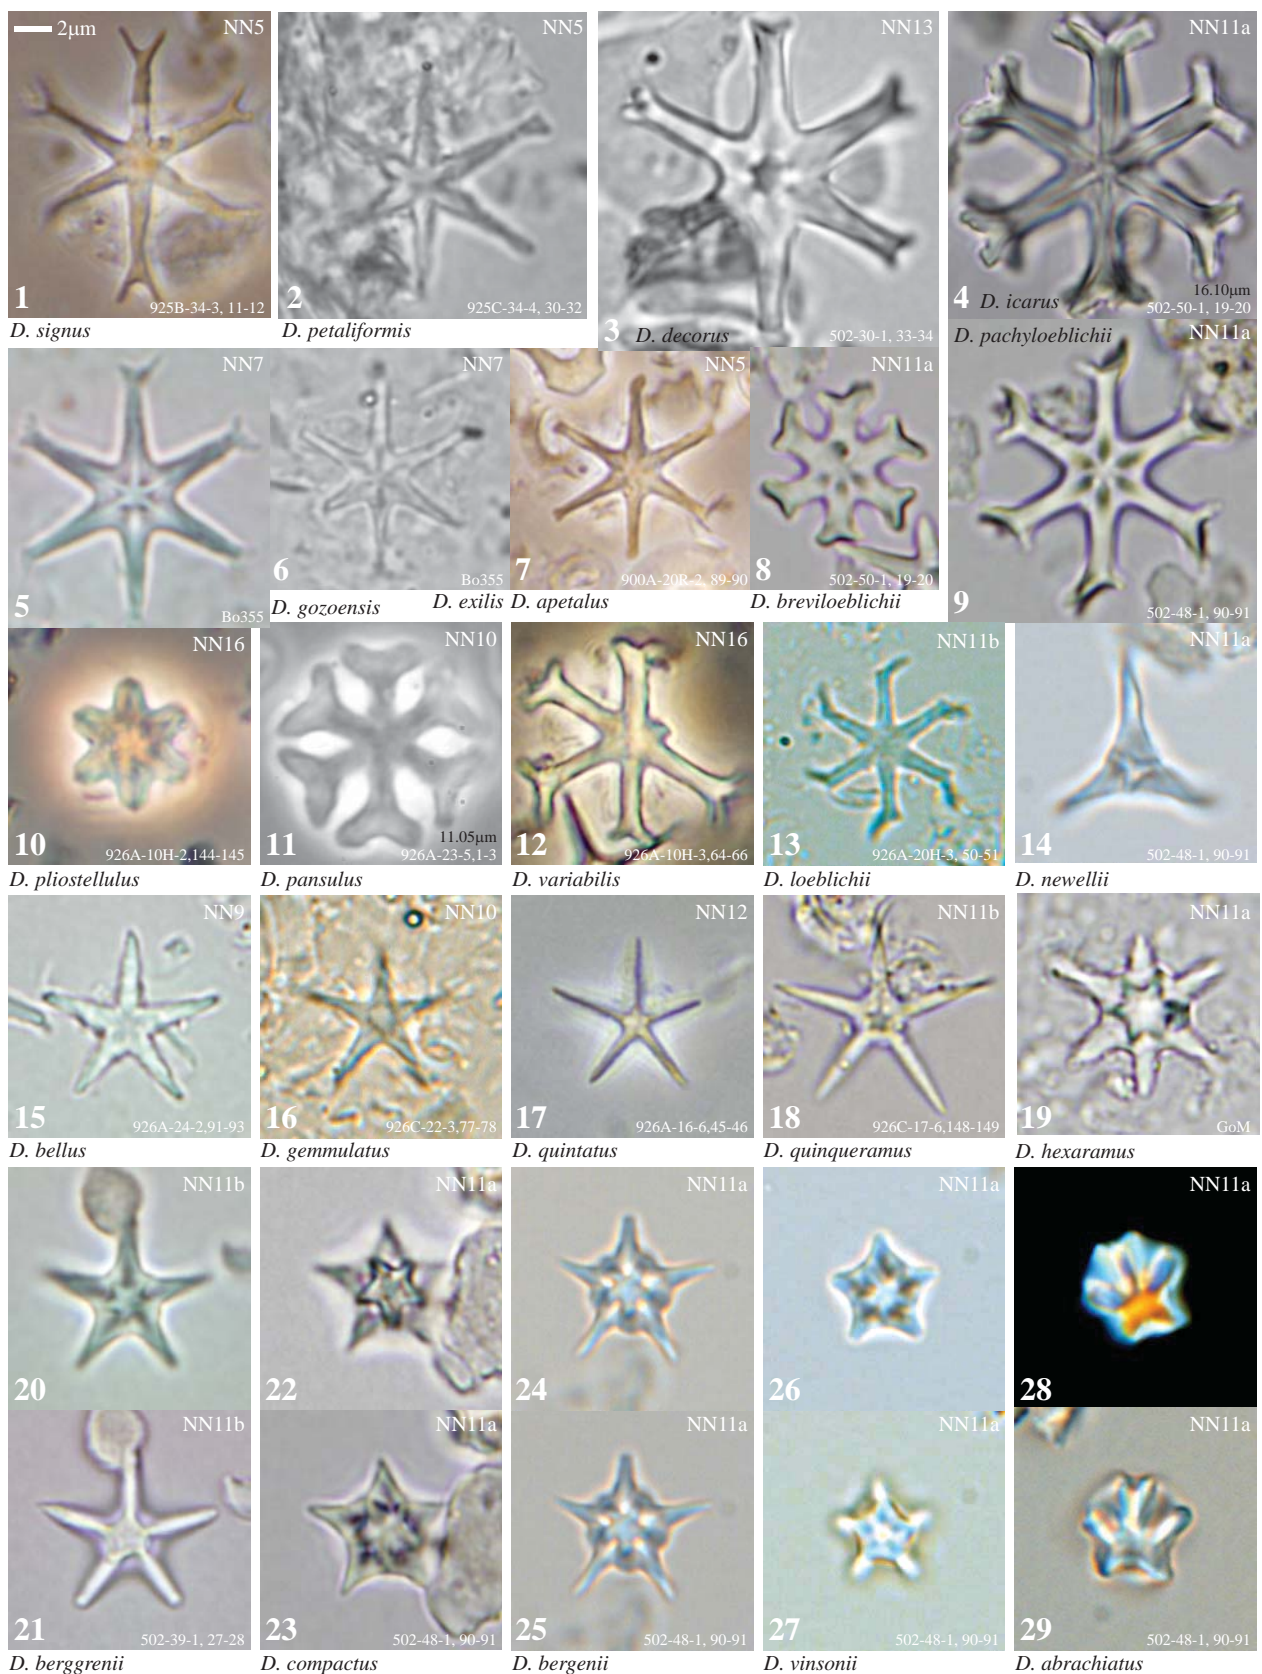

PLATE S4. Nannofossil genus *Discoaster* (middle-upper Miocene).



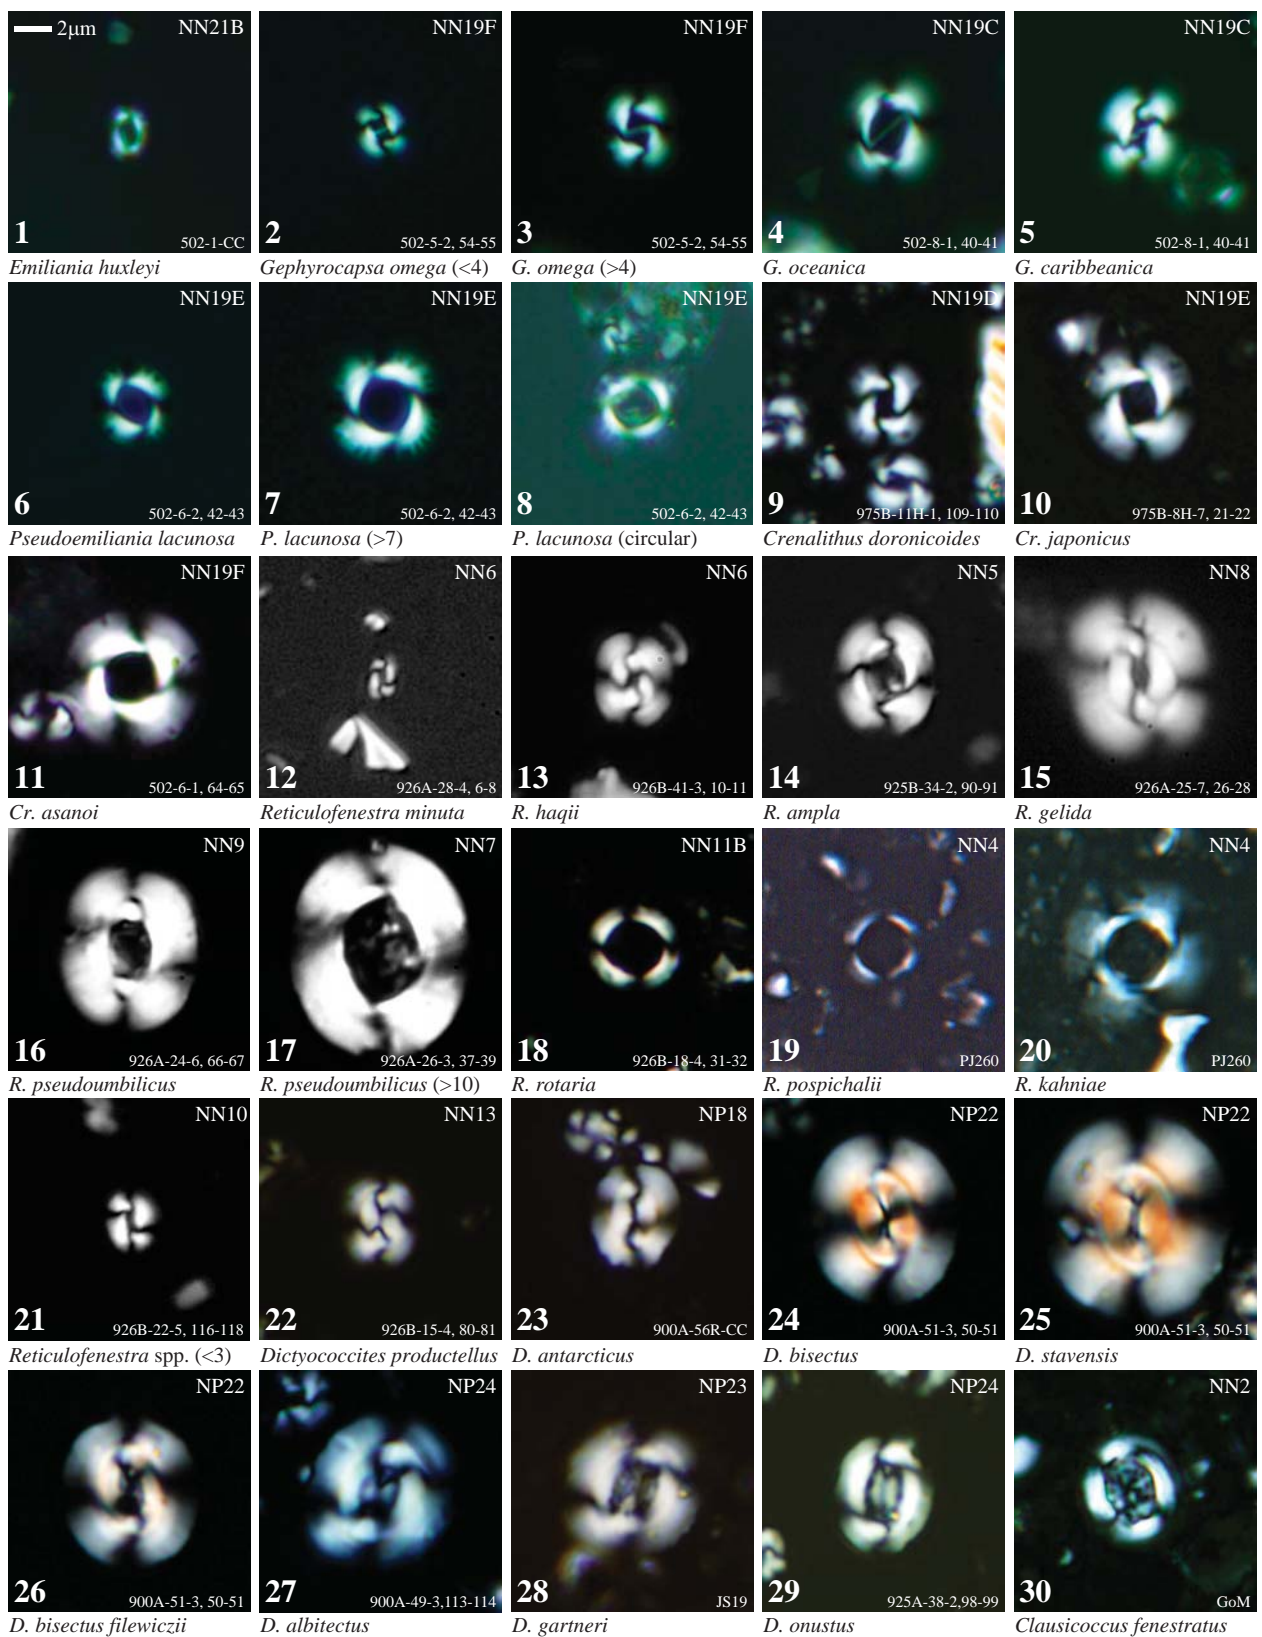

PLATE S5. Nannofossil Family Prinsiaceae

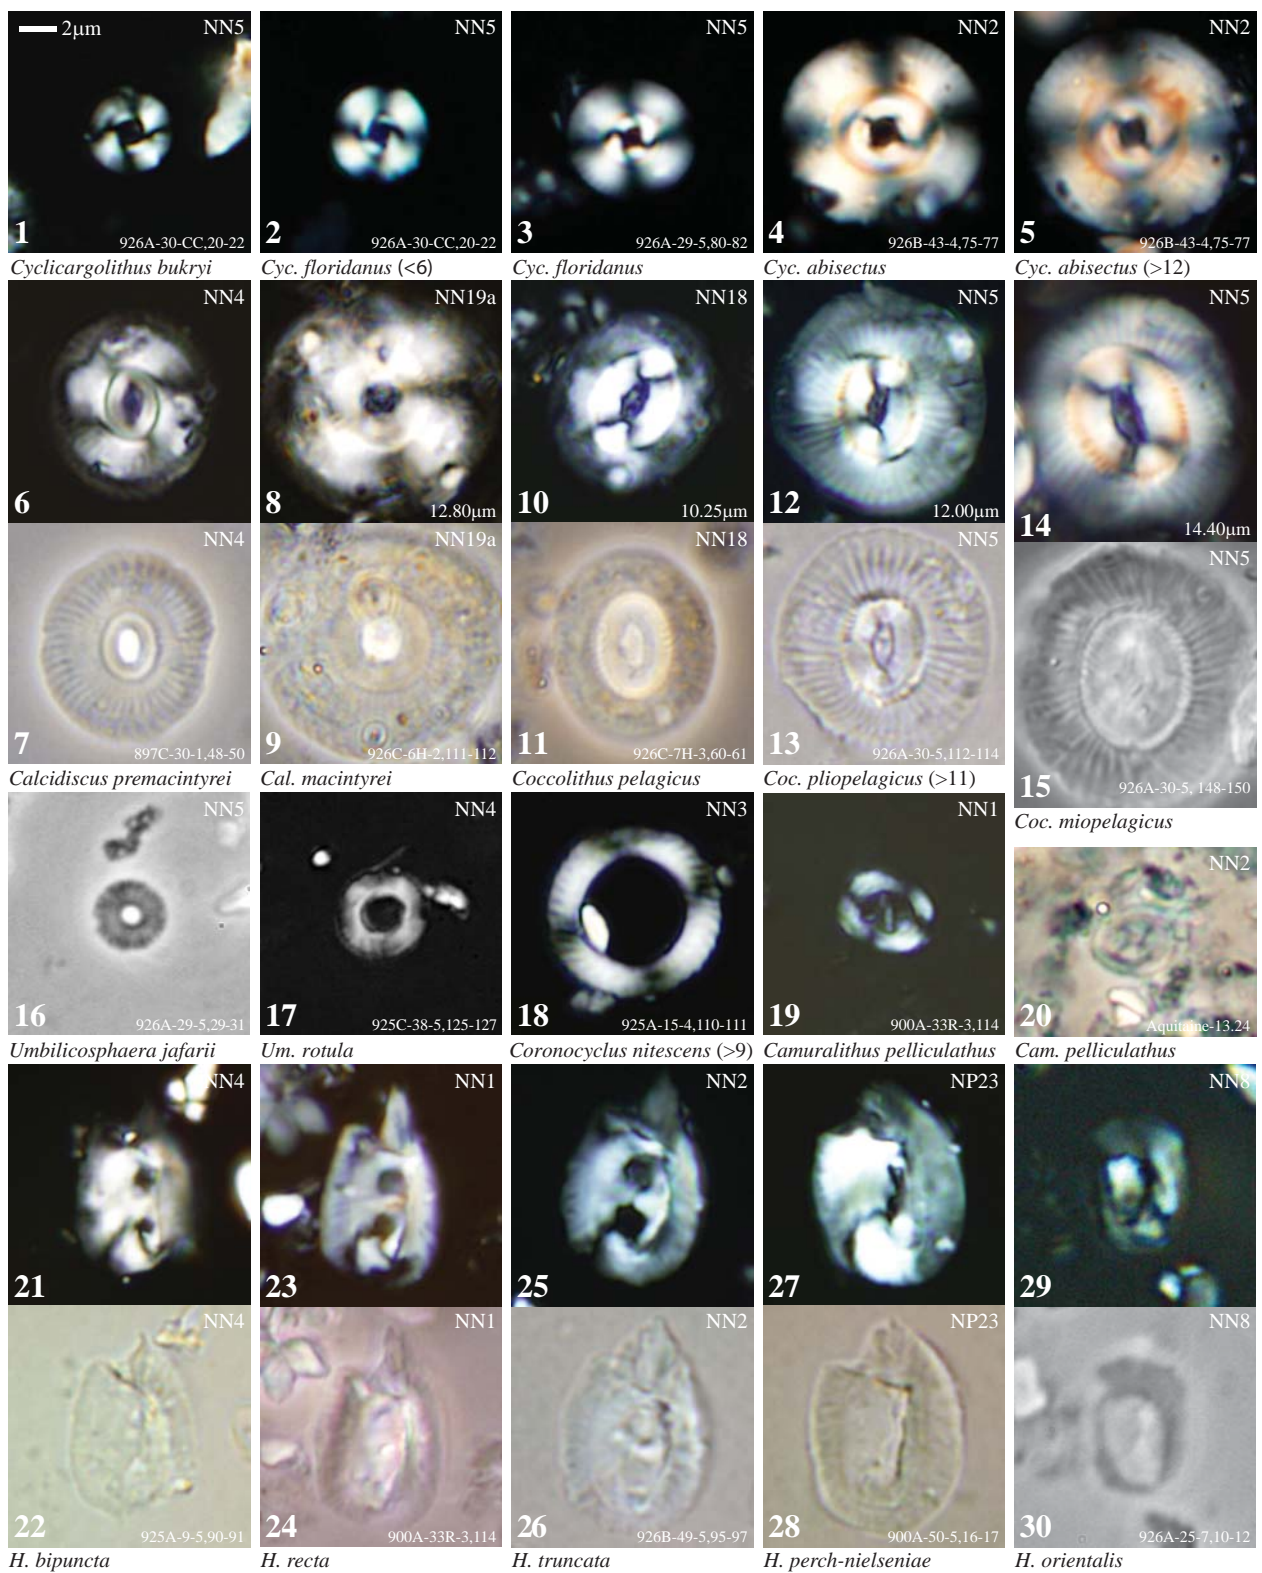

PLATE S6. Nannofossil Family Prinsiaceae and genus *Helicosphaera*



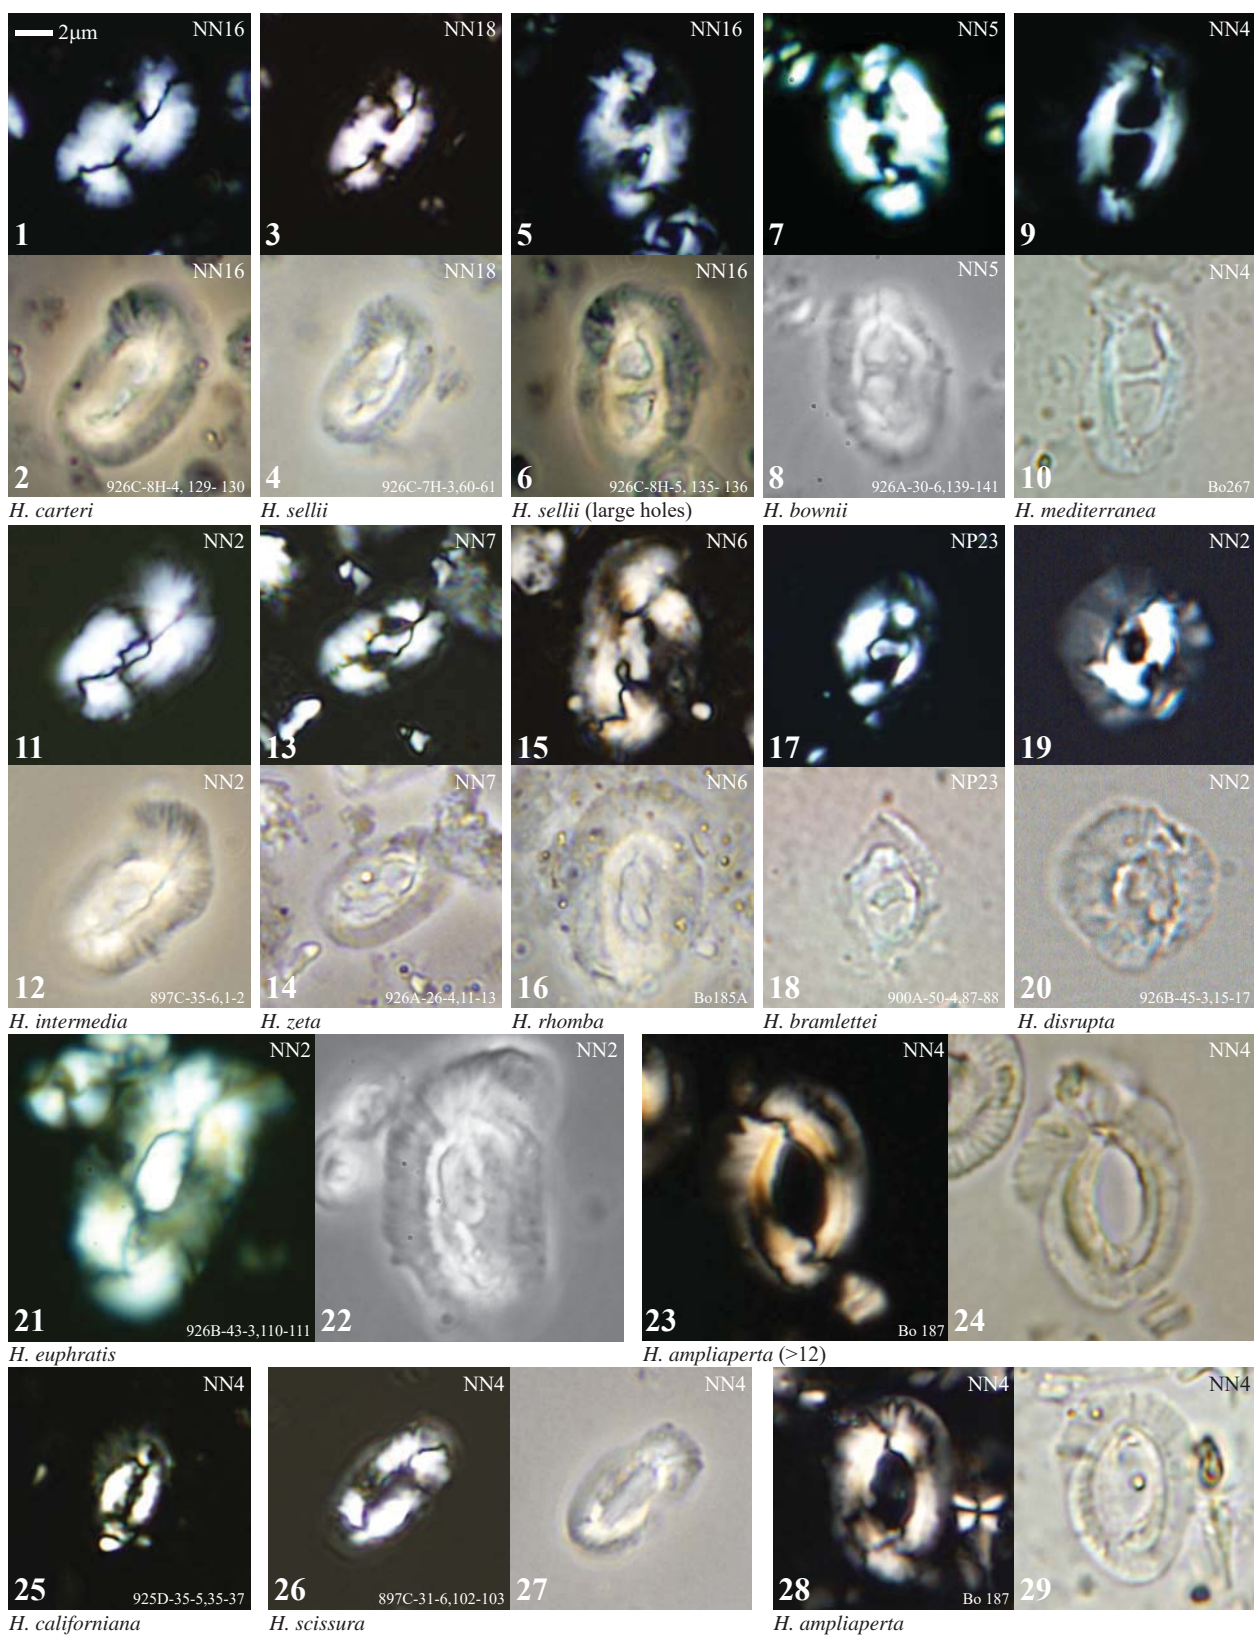

PLATE S7. Nannofossil genus *Helicosphaera*

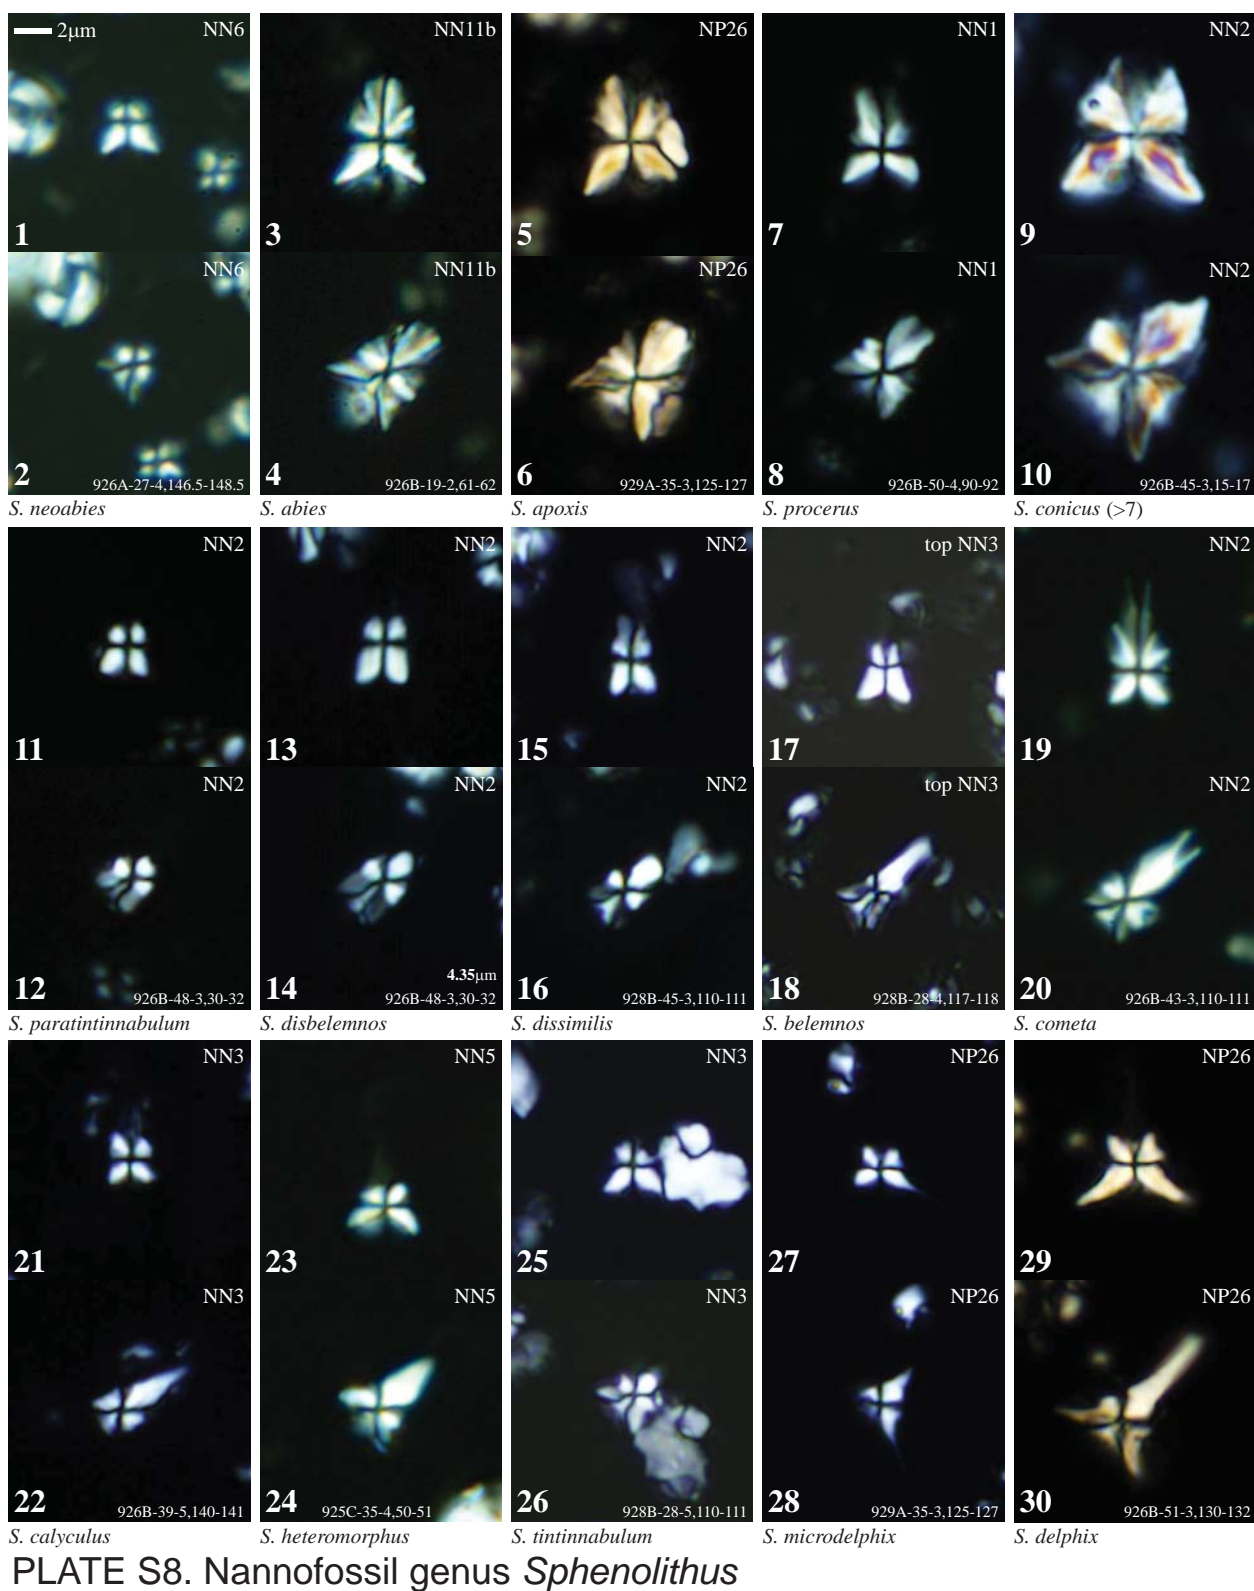



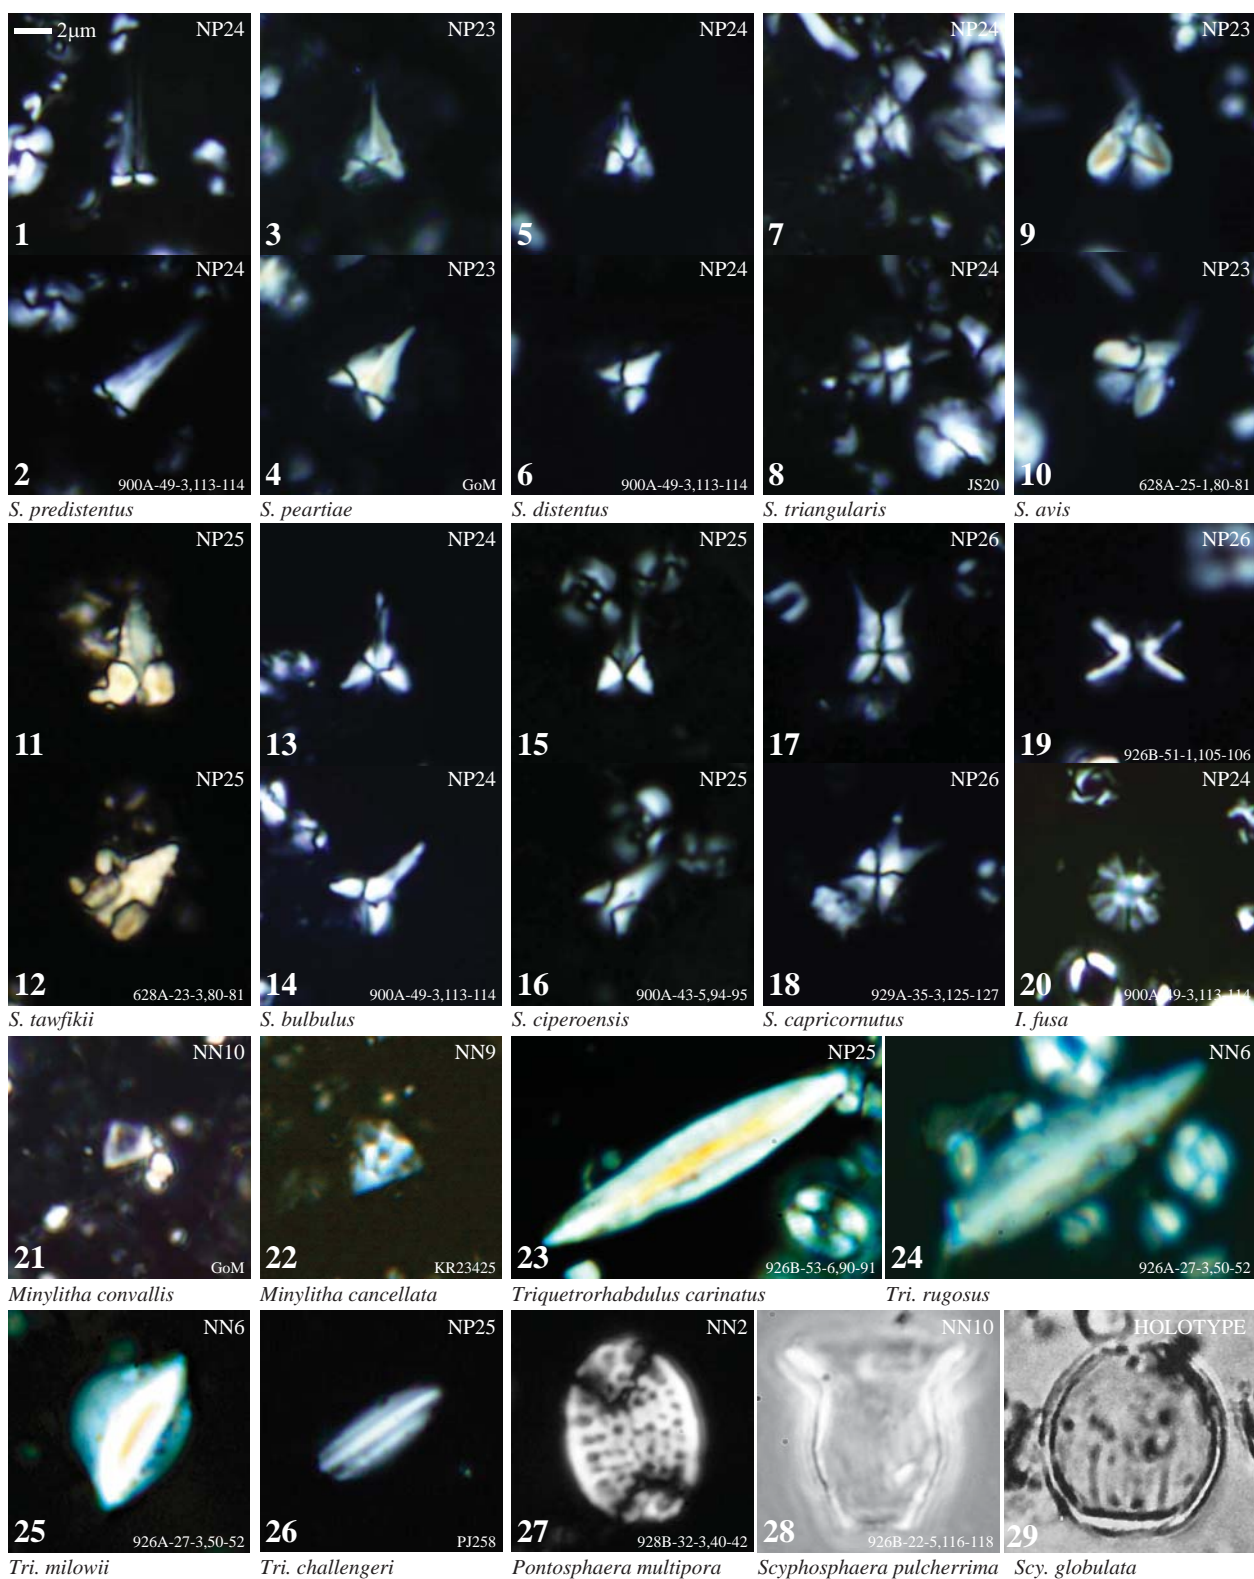

PLATE S9. Nannofossil genus *Sphenolithus* and assorted genera
